# Supplementary material for: National Routine Adult Immunization Programs among World Health Organization Member States: An Assessment of Health Systems to Deploy Future SARS-CoV-2 Vaccines
Source: bioRxiv or medRxiv preprint supplement (doi:10.1101/2020.10.16.20213967), 2020-12-16
Supplement: Supplementary file [file media-1.pdf]

## **DATA SUPPLEMENT**

**Title:** National Routine Adult Immunization Programs among World Health Organization Member States: An Assessment of Health Systems to Deploy Future SARS-CoV-2 Vaccines

**Supplemental Table 1. Countries Responding to Specific JRF Question Regarding Presence of an Adult Immunization Program, by Vaccine**

| WHO Region                         | Hepatitis B Vaccine |      | Herpes Zoster Vaccine |      | Influenza Vaccine |      | Pneumococcal Conjugate Vaccine |      | Pneumococcal Polysaccharide Vaccine |      | Any of the Assessed Vaccines |       |
|------------------------------------|---------------------|------|-----------------------|------|-------------------|------|--------------------------------|------|-------------------------------------|------|------------------------------|-------|
|                                    | n                   | %    | n                     | %    | n                 | %    | n                              | %    | n                                   | %    | n                            | %     |
| Africa<br>(n=47)                   | 3                   | 6.4  | 0                     | 0.0  | 3                 | 6.4  | 41                             | 87.2 | 0                                   | 0.0  | 41                           | 87.2  |
| Americas<br>(n=35)                 | 31                  | 88.6 | 4                     | 11.4 | 32                | 91.4 | 28                             | 80.0 | 16                                  | 45.7 | 35                           | 100.0 |
| Eastern<br>Mediterranean<br>(n=21) | 7                   | 33.3 | 1                     | 4.8  | 13                | 61.9 | 16                             | 76.2 | 4                                   | 19.1 | 20                           | 95.2  |
| Europe<br>(n=53)                   | 37                  | 69.8 | 31                    | 58.5 | 50                | 94.3 | 48                             | 90.6 | 34                                  | 64.2 | 52                           | 98.1  |
| South-East<br>Asia<br>(n=11)       | 0                   | 0.0  | 0                     | 0.0  | 1                 | 9.1  | 5                              | 45.5 | 0                                   | 0.0  | 6                            | 54.6  |
| Western<br>Pacific<br>(n=27)       | 5                   | 18.5 | 2                     | 7.4  | 15                | 55.6 | 19                             | 70.4 | 5                                   | 18.5 | 22                           | 81.5  |
| Worldwide<br>(n=194)               | 83                  | 42.8 | 38                    | 19.6 | 114               | 58.8 | 157                            | 80.9 | 59                                  | 30.4 | 176                          | 90.7  |

**Supplemental Table 2. Economic Characteristics of WHO Member States in 2018, by Reported National Adult Immunization Programs**

|                              | HepB program |      |            |      |                      | HZV program |       |            |      |         | Influenza vaccination program |       |           |      |         | PCV program |       |            |      |         | PPSV program |       |            |      |         |
|------------------------------|--------------|------|------------|------|----------------------|-------------|-------|------------|------|---------|-------------------------------|-------|-----------|------|---------|-------------|-------|------------|------|---------|--------------|-------|------------|------|---------|
|                              | Yes (N=72)   |      | No (N=121) |      | P-value <sup>1</sup> | Yes (N=17)  |       | No (N=175) |      | P-value | Yes (n=113)                   |       | No (N=79) |      | P-value | Yes (N=16)  |       | No (N=176) |      | P-value | Yes (N=35)   |       | No (N=157) |      | P-value |
|                              | n            | %    | n          | %    |                      | n           | %     | n          | %    |         | n                             | %     | n         | %    |         | n           | %     | n          | %    |         | n            | %     | n          | %    |         |
| WB Income group <sup>2</sup> |              |      |            |      |                      |             |       |            |      |         |                               |       |           |      |         |             |       |            |      |         |              |       |            |      |         |
| Low income (n=34)            | 0            | 0.0  | 34         | 28.1 | <0.001               | 0           | 0.0   | 34         | 19.4 | <0.001  | 1                             | 0.9   | 33        | 41.8 | <0.001  | 0           | 0.0   | 34         | 19.3 | <0.001  | 0            | 0.0   | 34         | 21.7 | <0.001  |
| Lower-middle income (n=46)   | 7            | 9.9  | 39         | 32.1 |                      | 0           | 0.0   | 46         | 26.3 |         | 15                            | 13.3  | 31        | 39.2 |         | 0           | 0.0   | 46         | 26.1 |         | 2            | 5.7   | 44         | 28.0 |         |
| Upper middle income (n=56)   | 29           | 40.9 | 27         | 22.3 |                      | 1           | 5.9   | 55         | 31.4 |         | 42                            | 37.2  | 14        | 17.7 |         | 0           | 0.0   | 56         | 31.8 |         | 6            | 17.1  | 50         | 31.9 |         |
| High income (n=56)           | 35           | 49.3 | 21         | 17.4 |                      | 16          | 94.1  | 40         | 22.9 |         | 55                            | 48.7  | 1         | 1.3  |         | 16          | 100.0 | 40         | 22.7 |         | 27           | 77.1  | 29         | 18.5 |         |
| Gavi eligible                | Yes (N=72)   |      | No (N=123) |      | P-value <sup>1</sup> | Yes (N=17)  |       | No (N=177) |      | P-value | Yes (n=114)                   |       | No (N=80) |      | P-value | Yes (N=16)  |       | No (N=178) |      | P-value | Yes (N=35)   |       | No (N=159) |      | P-value |
|                              | n            | %    | n          | %    |                      | n           | %     | n          | %    |         | n                             | %     | n         | %    |         | n           | %     | n          | %    |         | n            | %     | n          | %    |         |
| Yes (n=48)                   | 1            | 1.4  | 47         | 38.2 | <0.001               | 0           | 0.0   | 48         | 27.1 | 0.01    | 0                             | 0.0   | 48        | 60.0 | <0.001  | 0           | 0.0   | 48         | 27.0 | 0.02    | 0            | 0.0   | 48         | 31.8 | <0.001  |
| No (n=146)                   | 70           | 98.6 | 76         | 61.8 |                      | 17          | 100.0 | 129        | 72.9 |         | 114                           | 100.0 | 32        | 40.0 |         | 16          | 100.0 | 130        | 73.0 |         | 43           | 100.0 | 103        | 68.2 |         |

Abbreviations: HepB = Hepatitis B vaccine; HZV= Herpes Zoster Vaccine; PCV = pneumococcal conjugate vaccine; PPSV = pneumococcal polysaccharide vaccine; HPV= human papillomavirus vaccine

1. p-value for trend (World Bank income group comparisons)
2. Niue and The Cook Islands, not World Bank member countries, are excluded from the income categories
3. Reference category
4. Chi-square test (Gavi eligibility comparisons)

**Supplemental Table 3. Median per Capita Health Care Expenditures of WHO Member States in 2018, by reported National Adult Immunization Program**

| Adult Vaccination program     | Has Program | Statistic                  | Median per capita health care expenditure (USD) <sup>1</sup> |
|-------------------------------|-------------|----------------------------|--------------------------------------------------------------|
| HepB program                  | Yes (N=68)  | Median (IQR)               | 884 (412, 2118)                                              |
|                               | No (N=116)  | Median (IQR)               | 195 (45, 732)                                                |
|                               |             | <b>p-value<sup>2</sup></b> | <b>&lt;0.001</b>                                             |
| HZV program                   | Yes (N=17)  | Median (IQR)               | 2,882 (1,845, 3,465)                                         |
|                               | No (N=167)  | Median (IQR)               | 314 (62, 900)                                                |
|                               |             | <b>p-value</b>             | <b>&lt;0.001</b>                                             |
| Influenza vaccination program | Yes (N=109) | Median (IQR)               | 933 (482, 2,226)                                             |
|                               | No (N=75)   | Median (IQR)               | 59 (25, 196)                                                 |
|                               |             | <b>p-value</b>             | <b>&lt;0.001</b>                                             |
| PCV program                   | Yes (N=16)  | Median (IQR)               | 2,221 (1335, 3510)                                           |
|                               | No (N=168)  | Median (IQR)               | 319 (63, 884)                                                |
|                               |             | <b>p-value</b>             | <b>&lt;0.001</b>                                             |
| PPSV program                  | Yes (N=43)  | Median (IQR)               | 1,676 (930, 3,331)                                           |
|                               | No (N=151)  | Median (IQR)               | 208 (52, 564)                                                |
|                               |             | <b>p-value</b>             | <b>&lt;0.001</b>                                             |

HepB= hepatitis B; HZV = Herpes zoster virus vaccine; PCV = pneumococcal conjugate vaccine; PPSV= pneumococcal polysaccharide vaccine

<sup>1</sup>Excluding 10 countries with missing health care expenditure data

<sup>2</sup>Kruskal-Wallis test for difference in medians

**Supplemental Table 4. Immunization Program Characteristics of WHO Member states in 2018, by reported National Adult Immunization Programs**

| Introduced Hepatitis B birth dose        | n   | HepB program |      |     |       |         | HZV Program |      |     |       |         | Influenza vaccine program |      |    |       |         | PCV program |      |     |       |         | PPSV program |      |     |       |         |
|------------------------------------------|-----|--------------|------|-----|-------|---------|-------------|------|-----|-------|---------|---------------------------|------|----|-------|---------|-------------|------|-----|-------|---------|--------------|------|-----|-------|---------|
|                                          |     | Yes          |      | No  |       | p-value | Yes         |      | No  |       | p-value | Yes                       |      | No |       | p-value | Yes         |      | No  |       | p-value | Yes          |      | No  |       | p-value |
|                                          |     | n            | %    | n   | %     |         | n           | %    | n   | %     |         | n                         | %    | n  | %     |         | n           | %    | n   | %     |         | n            | %    | n   | %     |         |
| Yes                                      | 128 | 53           | 41.4 | 75  | 58.6  | 0.05    | 14          | 10.9 | 114 | 89.1  | 0.14    | 91                        | 71.1 | 37 | 28.9  | <0.001  | 12          | 9.4  | 116 | 90.6  | 0.43    | 27           | 21.1 | 101 | 78.9  | 0.12    |
| No                                       | 66  | 18           | 27.3 | 48  | 72.7  |         | 3           | 4.6  | 63  | 95.5  |         | 23                        | 34.9 | 43 | 65.2  |         | 4           | 6.1  | 62  | 93.9  |         | 8            | 12.1 | 58  | 87.9  |         |
| Introduced HPV                           |     |              |      |     |       |         |             |      |     |       |         |                           |      |    |       |         |             |      |     |       |         |              |      |     |       |         |
| Yes                                      | 90  | 50           | 55.6 | 40  | 44.4  | <0.001  | 14          | 10.9 | 114 | 89.1  | <0.001  | 73                        | 81.1 | 17 | 18.9  | <0.001  | 13          | 14.4 | 77  | 85.6  | <0.01   | 29           | 32.2 | 61  | 67.8  | <0.001  |
| No                                       | 104 | 21           | 20.2 | 83  | 79.8  |         | 17          | 18.9 | 73  | 81.1  |         | 41                        | 39.4 | 63 | 60.6  |         | 3           | 2.9  | 101 | 97.1  |         | 6            | 5.8  | 98  | 94.2  |         |
| Introduced Rotavirus vaccine             |     |              |      |     |       |         |             |      |     |       |         |                           |      |    |       |         |             |      |     |       |         |              |      |     |       |         |
| Yes                                      | 101 | 40           | 39.6 | 61  | 60.4  | 0.37    | 13          | 12.9 | 88  | 87.1  | 0.04    | 56                        | 55.5 | 45 | 44.6  | 0.33    | 10          | 9.9  | 91  | 90.1  | 0.38    | 23           | 22.8 | 78  | 77.2  | 0.07    |
| No                                       | 93  | 31           | 33.3 | 62  | 66.7  |         | 4           | 4.3  | 89  | 95.7  |         | 58                        | 62.4 | 35 | 37.6  |         | 6           | 6.5  | 87  | 93.6  |         | 12           | 12.9 | 81  | 87.1  |         |
| Functioning NITAG <sup>2</sup>           |     |              |      |     |       |         |             |      |     |       |         |                           |      |    |       |         |             |      |     |       |         |              |      |     |       |         |
| Yes                                      | 114 | 47           | 41.2 | 67  | 58.8  | 0.11    | 14          | 12.3 | 100 | 87.7  | 0.04    | 78                        | 68.4 | 36 | 31.6  | <0.01   | 13          | 11.4 | 101 | 88.6  | 0.06    | 23           | 20.2 | 91  | 79.8  | 0.36    |
| No                                       | 80  | 24           | 30.0 | 56  | 70.0  |         | 3           | 3.8  | 77  | 96.3  |         | 36                        | 45.0 | 44 | 55.0  |         | 3           | 3.8  | 77  | 96.3  |         | 12           | 15.0 | 68  | 85.0  |         |
| Eliminated maternal and neonatal tetanus |     |              |      |     |       |         |             |      |     |       |         |                           |      |    |       |         |             |      |     |       |         |              |      |     |       |         |
| Yes                                      | 180 | 71           | 39.4 | 109 | 60.0  | <0.01   | 17          | 9.4  | 163 | 90.6  | 0.23    | 114                       | 63.3 | 66 | 36.7  | <0.001  | 16          | 8.9  | 164 | 91.1  | 0.24    | 35           | 19.4 | 145 | 80.6  | 0.07    |
| No                                       | 14  | 0            | 0.0  | 14  | 100.0 |         | 0           | 0.0  | 14  | 100.0 |         | 0                         | 0.0  | 14 | 100.0 |         | 0           | 0.0  | 14  | 100.0 |         | 0            | 0.0  | 14  | 100.0 |         |
| DTP coverage ≥95% nationally             |     |              |      |     |       |         |             |      |     |       |         |                           |      |    |       |         |             |      |     |       |         |              |      |     |       |         |
| Yes                                      | 84  | 39           | 46.4 | 45  | 53.6  | 0.01    | 7           | 8.3  | 77  | 91.7  | 0.85    | 62                        | 73.8 | 22 | 26.2  | <0.001  | 10          | 11.9 | 74  | 88.1  | <0.01   | 18           | 21.4 | 66  | 78.6  | 0.28    |
| No                                       | 110 | 32           | 29.1 | 78  | 70.9  |         | 10          | 9.1  | 100 | 90.9  |         | 52                        | 47.3 | 58 | 52.7  |         | 6           | 5.5  | 104 | 94.6  |         | 17           | 15.5 | 93  | 84.6  |         |

HepB = Hepatitis B vaccine; HZV= Herpes Zoster Vaccine; PCV = pneumococcal conjugate vaccine; PPSV = pneumococcal polysaccharide vaccine; HPV= human papillomavirus vaccine; DTP= diphtheria, tetanus and pertussis containing vaccine

1. Chi-square test

2. National Immunization Technical Advisory Group; limited to n=134 countries for which this information was available

**Supplemental Table 5A. Analysis of Immunization Program Characteristics associated with the presence of one or more adult vaccination programs**

|                                          | Any adult vaccination program |       |                           |
|------------------------------------------|-------------------------------|-------|---------------------------|
|                                          | Yes<br>(N=120)                |       | aOR <sup>1</sup> (95% CI) |
|                                          | n                             | %     |                           |
| Introduced Hepatitis B birth dose        |                               |       |                           |
| Yes                                      | 94                            | 78.3  | 3.26 (1.2, 9.0)           |
| No                                       | 26                            | 21.7  |                           |
| Introduced HPV                           |                               |       |                           |
| Yes                                      | 76                            | 63.3  | 3.48 (1.3, 9.4)           |
| No                                       | 44                            | 36.7  |                           |
| Introduced Rotavirus vaccine             |                               |       |                           |
| Yes                                      | 60                            | 50.0  | 1.13 (0.4, 2.9)           |
| No                                       | 60                            | 50.0  |                           |
| Functional NITAG <sup>2</sup>            |                               |       |                           |
| Yes                                      | 82                            | 68.3  | 6.74 (2.3, 19.7)          |
| No                                       | 38                            | 31.7  |                           |
| Eliminated maternal and neonatal tetanus |                               |       |                           |
| Yes                                      | 120                           | 100.0 | n/a                       |
| No                                       | 0                             | 0.0   |                           |
| DTP coverage $\geq$ 95% nationally       |                               |       |                           |
| Yes                                      | 66                            | 55.0  | 1.57 (0.6, 3.9)           |
| No                                       | 54                            | 45.0  |                           |
| HIC or UMIC2                             |                               |       |                           |
| Yes                                      | 100                           | 84.0  | 19.28 (6.5, 57.7)         |
| No                                       | 19                            | 16.0  |                           |

1. Adjusted for all other characteristics in the table

2. Two countries without world bank income classifications excluded from denominator

**Supplemental Table 5B. Analysis of Immunization Program Characteristics associated with the presence of individual adult vaccination programs**

|                                          | Adult HepB program |       |                | Adult HZV Program |       |                  | Adult influenza vaccination program |       |                           | Adult PCV Program |       |                 | Adult PPSV Program |       |                 |
|------------------------------------------|--------------------|-------|----------------|-------------------|-------|------------------|-------------------------------------|-------|---------------------------|-------------------|-------|-----------------|--------------------|-------|-----------------|
|                                          | Yes (N=71)         |       |                | Yes (N=17)        |       |                  | Yes (N=114)                         |       |                           | Yes (N=16)        |       |                 | Yes (N=35)         |       |                 |
|                                          | n                  | %     | aOR (95% CI)   | n                 | %     | aOR (95% CI)     | n                                   | %     | aOR <sup>1</sup> (95% CI) | n                 | %     | aOR (95% CI)    | n                  | %     | aOR (95% CI)    |
| Introduced Hepatitis B birth dose        |                    |       |                |                   |       |                  |                                     |       |                           |                   |       |                 |                    |       |                 |
| Yes                                      | 53                 | 74.7  | 1.0 (0.4, 2.3) | 14                | 82.4  | 2.0 (0.5, 8.5)   | 91                                  | 79.8  | 3.7 (1.4, 10.1)           | 12                | 75.0  | 0.9 (0.2, 3.1)  | 27                 | 77.1  | 1.3 (0.5, 3.4)  |
| No                                       | 18                 | 25.4  |                | 3                 | 17.7  |                  | 23                                  | 20.2  |                           | 4                 | 25.0  |                 | 8                  | 22.9  |                 |
| Introduced HPV                           |                    |       |                |                   |       |                  |                                     |       |                           |                   |       |                 |                    |       |                 |
| Yes                                      | 50                 | 70.4  | 1.9 (0.9, 4.1) | 17                | 100.0 | n/a              | 73                                  | 64.0  | 3.4 (1.3, 9.0)            | 13                | 81.3  | 1.9 (0.4, 7.8)  | 29                 | 82.9  | 3.3 (1.2, 9.3)  |
| No                                       | 21                 | 29.6  |                | 0                 | 0.0   |                  | 41                                  | 36.0  |                           | 3                 | 18.8  |                 | 6                  | 17.1  |                 |
| Introduced Rotavirus vaccine             |                    |       |                |                   |       |                  |                                     |       |                           |                   |       |                 |                    |       |                 |
| Yes                                      | 40                 | 56.3  | 1.8 (0.9, 3.9) | 13                | 76.5  | 2.5 (0.7, 9.6)   | 56                                  | 49.1  | 0.95 (0.4, 2.4)           | 10                | 62.5  | 2.1 (0.6, 7.1)  | 23                 | 65.7  | 2.18 (0.9, 5.3) |
| No                                       | 31                 | 43.7  |                | 4                 | 23.5  |                  | 58                                  | 50.9  |                           | 6                 | 37.5  |                 | 12                 | 34.3  |                 |
| Functional NITAG <sup>2</sup>            |                    |       |                |                   |       |                  |                                     |       |                           |                   |       |                 |                    |       |                 |
| Yes                                      | 47                 | 66.2  | 1.5 (0.7, 3.1) | 14                | 82.4  | 3.17 (0.8, 12.8) | 78                                  | 68.4  | 5.6 (2.1, 15.3)           | 13                | 81.3  | 3.1 (0.8, 11.9) | 23                 | 65.7  | 1.2 (0.5, 2.8)  |
| No                                       | 24                 | 33.8  |                | 3                 | 17.7  |                  | 36                                  | 31.6  |                           | 3                 | 18.8  |                 | 12                 | 34.3  |                 |
| Eliminated maternal and neonatal tetanus |                    |       |                |                   |       |                  |                                     |       |                           |                   |       |                 |                    |       |                 |
| Yes                                      | 71                 | 100.0 | n/a            | 17                | 100.0 | n/a              | 114                                 | 100.0 | n/a                       | 16                | 100.0 | n/a             | 35                 | 100.0 | n/a             |
| No                                       | 0                  | 0.0   |                | 0                 | 0.0   |                  | 0                                   | 0.0   |                           | 0                 | 0.0   |                 | 0                  | 0.0   |                 |
| DTP coverage ≥95% nationally             |                    |       |                |                   |       |                  |                                     |       |                           |                   |       |                 |                    |       |                 |

|                          |    |      |                 |    |       |                |    |      |                  |    |       |                |    |      |                 |
|--------------------------|----|------|-----------------|----|-------|----------------|----|------|------------------|----|-------|----------------|----|------|-----------------|
| Yes                      | 39 | 54.9 | 1.2 (0.6, 2.1)  | 7  | 41.2  | 0.7 (0.2, 2.3) | 62 | 54.4 | 1.2 (0.5, 2.8)   | 10 | 62.5  | 1.7 (0.5, 5.5) | 18 | 51.4 | 1.0 (0.4, 2.3)  |
| No                       | 32 | 45.1 |                 | 10 | 58.8  |                | 52 | 45.6 |                  | 6  | 37.5  |                | 17 | 48.6 |                 |
| HIC or UMIC <sup>2</sup> |    |      |                 |    |       |                |    |      |                  |    |       |                |    |      |                 |
| Yes                      | 64 | 90.1 | 10.1 (3.6,28.1) | 17 | 100.0 | n/a            | 97 | 85.8 | 17.3 (6.2, 48.4) | 16 | 100.0 | n/a            | 33 | 94.3 | 9.2 (1.9, 45.1) |
| No                       | 7  | 9.9  |                 | 0  | 0.0   |                | 16 | 14.2 |                  | 0  | 0.0   |                | 2  | 5.7  |                 |

1. Adjusted for all other characteristics in the table
2. Two countries without world bank income classifications excluded from denominator
